# REPORTS

## Physical Activity and Breast Cancer Risk in a Cohort of Young Women

Beverly Rockhill, Walter C. Willett, David J. Hunter, JoAnn E. Manson, Susan E. Hankinson, Donna Spiegelman, Graham A. Colditz\*

**Background:** Increased physical activity has been hypothesized to be a means of breast cancer prevention. We examined the associations between physical activity at two different times in life and breast cancer risk. **Methods:** We analyzed data from the Nurses' Health Study II, a prospective study of women aged 25–42 years in 1989. On the baseline survey, women were asked, "While in high school and between the ages 18 and 22 years, how often did you participate in strenuous physical activity at least twice a week?" We averaged answers to these two questions to develop a measure of late adolescent activity. Women were also asked at baseline to report the number of hours per week they currently spent in different nonoccupational activities. During 6 years of follow-up, we identified 372 cases of invasive breast cancer. Data were analyzed by use of multivariate pooled logistic regression to produce relative risk (RR) and confidence intervals (CIs) of being diagnosed with the disease. **Results:** Women who were more active in late adolescence were not at reduced risk of breast cancer compared with less active women. For those women who reported engaging in strenuous activity at least twice per week for 10–12 months per year in late adolescence, the RR of cancer, compared with those who never engaged in such activity, was 1.1 (95% CI = 0.8–1.6). Similarly, higher levels of recent

nonoccupational physical activity were not associated with reduced risk of breast cancer (RR for  $\geq 7$  hours of activity/week relative to  $<1$  hour/week = 1.1; 95% CI = 0.8–1.5). **Conclusion:** Our findings do not support a link between physical activity, in late adolescence or in the recent past, and breast cancer risk among young adult women. [J Natl Cancer Inst 1998;90:1155–60]

Increased physical activity has been hypothesized to be a means of primary prevention of breast cancer. Activity can lead to lower cumulative exposure to circulating ovarian hormones; specifically, strenuous physical activity at a young age delays the onset of regular ovulatory cycles (1–4), and activity during the reproductive years may reduce levels of circulating ovarian hormones and the frequency of regular cycles (5,6). Physical activity might also act to lower breast cancer risk among postmenopausal women by reducing fat stores, which are the locus of conversion of the androgen androstenedione to estrone (7,8).

There is currently no scientific consensus on the critical time period of exposure or on the level of intensity of activity that is needed to influence breast cancer risk. Consequently, epidemiologic studies of physical activity and breast cancer have been heterogeneous in terms of the age at breast cancer diagnosis, methods for measuring intensity and duration of activity, and the period in life for which activity was assessed. For instance, Bernstein et al. (9) conducted a case-control study of women under age 40 years and quantified physical activity as categories of average number of hours per week of participation in physical exercise between menarche and the study reference date. To date, Bernstein et al. have reported the strongest reduction in risk associated with physical activity, and they concluded from their analyses that lifelong activity pattern is the critical exposure of interest. Most recently, Thune et al. (10), in a 14-year prospective study of women aged

20–54 years at baseline, considered both time and intensity in their activity classification. Thune et al. found that breast cancer risk was reduced with higher levels of recent activity and that the effect of physical activity on breast cancer risk appeared stronger in premenopausal than in postmenopausal women, although the number of premenopausal cases (100) was relatively small.

To date, Bernstein et al. (9) have been the only investigators to consider a measure of lifelong activity. Several investigators have focused on activity in late adolescence/early adulthood (e.g., 11–13), while others (14–16), including Thune et al. (10), examined only adult activity. Still other investigators (17–19) examined both time periods.

Perhaps because of such heterogeneity in methods and because selection and recall biases could influence the results of case-control studies, the epidemiologic evidence for the association between physical activity and breast cancer risk is inconsistent. Some studies have found a strong to moderate reduction in risk associated with higher levels of physical ac-

*\*Affiliations of authors:* B. Rockhill, Channing Laboratory, Department of Medicine, Harvard Medical School and Brigham and Women's Hospital, Boston, MA; W. C. Willett, Channing Laboratory, Department of Medicine, Harvard Medical School and Brigham and Women's Hospital, and Departments of Epidemiology and Nutrition, Harvard School of Public Health, Boston; D. J. Hunter, S. E. Hankinson, G. A. Colditz, Channing Laboratory, Department of Medicine, Harvard Medical School and Brigham and Women's Hospital, and Department of Epidemiology, Harvard School of Public Health; J. E. Manson, Channing Laboratory, and Division of Preventive Medicine, Harvard Medical School and Brigham and Women's Hospital, and Department of Epidemiology, Harvard School of Public Health; D. Spiegelman, Departments of Epidemiology and Biostatistics, Harvard School of Public Health.

*Correspondence to:* Beverly Rockhill, Ph.D., Channing Laboratory, 181 Longwood Ave., Boston, MA 02115. E-mail: beverly.rockhill@channing.harvard.edu

See "Notes" following "References."

© Oxford University Press

tivity (9–11,17), others found only slight decreases in risk (14,16), and in others no association (18,19) or even the suggestion of a positive association (15,16) was observed.

Here, we report the associations between nonoccupational physical activity and risk of breast cancer in a large prospective cohort of mainly premenopausal women. We examine the effect of activity in late adolescence as well as recent adult activity.

## Methods

The Nurses' Health Study II is a prospective cohort study that was established in 1989, when 116 671 nurses, 25–42 years of age, completed a baseline questionnaire about their medical histories and lifestyles. Subsequent questionnaires requesting updated information on risk factors and medical events were mailed every 2 years. All members of the cohort were free of cancer, except for nonmelanoma skin cancer, in 1989. We observed 95% of the potential person-time of follow-up in this cohort between 1989 and 1995 (618 010 of 651 080 person-years); the remaining 5% of the person-years were lost to follow-up. The protocol for the study was approved by the Human Research Committees of the Brigham and Women's Hospital and the Harvard School of Public Health, Boston, MA.

### Assessment of Physical Activity

On the 1989 questionnaire, nurses were asked two questions pertaining to physical activity earlier in their lives. They were asked to report the number of months per year that they engaged in strenuous physical activity (e.g., swimming, aerobics, field hockey, basketball, cycling, and/or running) at least two times per week while they were in high school and were between the ages of 18–22 years. Response categories for each question were as follows: never; 1–3 months per year; 4–6 months per year; 7–9 months per year; and 10–12 months per year. We assigned scores of 0–4 according to the five response categories (e.g., never = 0, 1–3 months/year = 1, etc.) and then computed a rounded (integer) mean from the two scores. Thus, this average score was also made up of values of 0, 1, 2, 3, and 4. We computed an average for each nurse who had no missing data on both questions regarding early physical activity. In analyses, we modeled the ranked categories of the average late adolescent activity score as a series of indicator variables. We also analyzed the two activity measures (physical activity while attending high school and physical activity during ages 18–22 years) separately.

On the 1989 questionnaire, nurses were also asked about their recent nonoccupational physical activity. They reported the average time spent per week during the past year on each of the following activities: walking or hiking outdoors; jogging (slower than 10 minutes/mile); running (10 minutes/mile or faster); bicycling (including use of a stationary bicycle); lap swimming; playing tennis or squash; participation in calisthenics, aerobics, and aerobic dance; using a rowing machine; and partici-

pation in other aerobic activity (such as lawn mowing). Each woman also reported her usual walking pace (easy, normal, brisk, or very brisk). We created a measure of hours per week of moderate plus vigorous activity by summing up the hours spent at all of the physical activities, except for walking at an easy or normal pace (we considered such walking to be light physical activity). In examining associations with breast cancer, we categorized average hours per week of moderate plus vigorous activity into five levels. The reference group were those women with less than 1 hour of moderate plus vigorous physical activity per week. The remaining categories were 1.0–1.9, 2.0–3.9, 4.0–6.9, and greater than or equal to 7.0 hours of moderate plus vigorous physical activity per week. Again, we modeled these categories as a series of four indicator variables.

### Data on Menstrual Regularity and Body Size Parameters

In 1989, nurses were asked several questions about their menstrual cycles earlier in life. They reported the usual length of their menstrual cycle during ages 18–22 years (<21, 21–25, 26–31, 32–39, 40–50, and >50 days, or too irregular to estimate) and the pattern of their menstrual cycles (very regular, regular, usually irregular, always irregular, or no periods) during both high school and ages 18–22 years (while not using oral contraceptives).

In 1989, women reported their height, current weight, and weight at age 18 years. We used body mass index (BMI, weight in kilograms divided by height in meters squared) as a measure of adiposity. We also calculated weight change during the period between age 18 years and 1989. The self-reported measure of weight at age 18 years has been validated in a subsample of 118 women (20) through review of college entrance physical examination records. The Spearman correlation between recalled and recorded weight at age 18 years was .87. Participants slightly underreported weight at age 18 years (mean difference, 1.4 kg). The precision of self-reported current weight was evaluated in a subsample of 140 participants from a similar cohort study of nurses (21). Trained technicians visited the substudy participants twice, approximately 6 months apart, to measure weight. The Pearson correlation coefficient between self-reported weight and the average of the technicians' two measurements was .97. Again, participants underreported current weight; the mean difference was 3.3 kg. The degree of underreporting did not vary appreciably across levels of current weight.

### Data on Other Risk Factors

Age at menarche was reported on the baseline questionnaire. Information on other risk factors, including parity, age at first birth, history of benign breast disease, family history of breast cancer in mother and/or sister, and oral contraceptive use, was reported on the baseline questionnaire and was updated every 2 years based on responses to the follow-up questionnaires. Thus, women's status on these covariates could change over time. We also included data on recent alcohol consumption (within the past year), as measured on the 1989 baseline questionnaire, as a covariate in models.

On each questionnaire, we collected data on menopausal status and, where applicable, age at

menopause. Postmenopausal women were asked about their use of hormone replacement therapy on each survey. At baseline, only 2.4% of the women were postmenopausal; this percentage rose to 4.6% by 1993. Less than 5% of the breast cancer cases in these analyses were diagnosed postmenopausally. The descriptive data and associations we report here (based on the sample containing both premenopausal and postmenopausal women, with no adjustment for menopausal status or postmenopausal hormone use) were changed little when we restricted the sample to women premenopausal at each time point or when we used the entire sample but included the covariates of menopausal status and postmenopausal hormone use in the statistical models.

### Identification of Invasive Breast Cancer Cases

On the 1991, 1993, and 1995 questionnaires, women were asked if they had been diagnosed with breast cancer in the previous 2 years. (Women who missed a questionnaire, but re-entered the cohort on a subsequent questionnaire, reported about breast cancer diagnoses since the last questionnaire they returned.) Deaths in the cohort are reported by family members and the postal service or were detected by a search of the National Death Index for participants who have been lost to follow-up. In this cohort, there have been 19 deaths from breast cancer; two of these deaths were detected by the National Death Index search. For identified cases of breast cancer, we requested permission from each case subject to obtain hospital records and pathology reports. Pathology reports were obtained for 89% of the case subjects, and of these, 98% confirmed the self-reported diagnosis of breast cancer. Those reported cases whose records failed to confirm breast cancer were excluded from analyses. However, because the degree of self-reporting accuracy was high, we included self-reported cases from whom records could not be obtained. There were a total of 372 case subjects with invasive breast cancer for whom we obtained complete data on the exposure(s) and covariates of interest. All results reported here were unchanged when we included *in situ* cases ( $n = 40$ ) with the invasive cases.

### Statistical Analysis

We used multivariate pooled logistic regression to model the risk of being diagnosed with breast cancer over the 6-year follow-up period (1989 through 1995) for each of the activity variables. Women were classified with respect to all potential confounders and then with respect to their physical activity level. Each participant contributed person-time of follow-up from the time the baseline questionnaire was returned in 1989 until the end of follow-up (June 1, 1995), the onset of the outcome of interest, death from any cause, or loss to follow-up. The number of cases and person-years that occurred within each exposure level within each strata were counted. For covariates that remain constant throughout the duration of the study, such as age at menarche, cases and person-time of follow-up were assigned to the exposure level observed at baseline in 1989. For time-varying covariates, such as current oral contraceptive use or parity, cases and person-time were re-assigned every 2 years according to the updated exposure values reported on each of the

biennial questionnaires. From these summary tables, incidence rates were calculated as the sum of the cases divided by the sum of person-time observed for each exposure level. Incidence rate ratios (relative risks [RRs]) for each activity level were calculated by dividing the incidence rate in that level by the rate in the reference (lowest activity) level.

We present both age-adjusted RRs as well as RRs adjusted simultaneously for a variety of potential confounders. The covariates of age at menarche and BMI at age 18 years may act, in part, as intermediate variables through which activity early in life influences breast cancer risk. However, in these data, controlling for these two covariates, alone and in combination with other covariates, did not alter relative risk estimates for any of the activity variables. Similarly, weight change between age 18 years and 1989 and BMI in 1989 might be intermediate variables through which strenuous physical activity might influence breast cancer risk. Once again, however, adjustment for these factors changed no RR estimates in any models. On the basis of such findings and a desire for models that avoid the conceptual problem of including the likely intermediate variables related to weight and weight change, our fully adjusted RRs are adjusted for the following factors: age at baseline (continuous), age in years at menarche (<12, 12, 13, and  $\geq 14$  years), parity and age at first birth (nulliparous, parity 1–2 and age at first birth <25 years, parity 1–2 and age at first birth 25–29 years, parity 1–2 and age at first birth  $\geq 30$  years, parity  $\geq 3$  and age at first birth <25 years, and parity  $\geq 3$  and age at first birth  $\geq 25$  years), family history of breast cancer in mother and/or sister (yes or no), history of benign breast disease (yes or no), recency and duration of oral contraceptive use (never, past user with duration of use <4 years, past user with duration of use  $\geq 4$  years, current user with duration of use <4 years, and current user with du-

ration of use  $\geq 4$  years), recent alcohol consumption (in average grams per day: 0, 0.1–1.4, 1.5–4.9, 5.0–9.9, and  $\geq 10$ ), and height ( $\leq 59$ , 59.1–62, 62.1–65, 65.1–68, and  $>68$  inches). Age at menarche, family history of breast cancer, alcohol consumption, and height were assessed once, at baseline. Parity and age at first birth, history of benign breast disease, and oral contraceptive history were assessed on each survey; women's status on each of these covariates was thus updated every 2 years in our models. We present two-sided 95% confidence intervals (CIs) for all RRs.

Only women with complete data on all activity variables and covariates of interest were included in the statistical models and in the presentations of results. A total of 105 564 women at baseline had complete data on all of the variables of interest. Of these, we excluded 1096 women because they reported an unusually high number of hours per week of moderate plus vigorous activity ( $>28$  hours/week); it is likely that such women misread the activity questions. The remaining 104 468 women accrued a total of 518 297 person-years of observation between 1989 and 1995.

## Results

Tables 1 and 2 show the crude distribution of relevant covariates according to average level of late adolescent physical activity (Table 1) and recent adult activity (Table 2). For both of these physical activity variables, women who were more active were more likely to be younger, nulliparous, current users of oral contraceptives, and to report no recent alcohol consumption (within the year prior to the

baseline survey) compared with those less active. The gradients in age at menarche and BMI at age 18 years were stronger across levels of late adolescent physical activity than across levels of recent physical activity. Women who were more active in late adolescence were more likely to report a late menarche (age,  $\geq 14$  years) and were leaner at age 18 years compared with women less active during this period. There was also a positive, monotonic association between adolescent physical activity level and height; the association between height and recent activity level was less pronounced. Both BMI in 1989 and weight change during the period from age 18 years to 1989 were inversely associated with each physical activity variable; associations were stronger with recent physical activity than with late adolescent activity.

There were no appreciable differences by level of late adolescent or recent physical activity in either the proportion of women recalling irregular menstrual cycles in high school (approximately 30% of women in each physical activity level) or in the proportion recalling long menstrual cycles ( $\geq 40$  days) between ages 18 and 22 years (7%–8% of women in each activity level). In addition, first-degree family history of breast cancer was not

**Table 1.** Characteristics of participants (as reported on 1989 baseline questionnaire) according to average level of vigorous physical activity during high school and between ages 18–22 years\*

| Characteristic                                                             | Average level of vigorous physical activity during high school and between ages 18–22y |            |            |            |            |
|----------------------------------------------------------------------------|----------------------------------------------------------------------------------------|------------|------------|------------|------------|
|                                                                            | Never                                                                                  | 1–3 mo/y   | 4–6 mo/y   | 7–9 mo/y   | 10–12 mo/y |
| No. of participants                                                        | 18 291                                                                                 | 22 067     | 25 395     | 22 729     | 15 986     |
| Mean age (standard deviation)                                              | 36.0 (4.3)                                                                             | 34.5 (4.6) | 34.2 (4.7) | 33.7 (4.7) | 33.5 (4.6) |
| Menarche $\geq 14$ y of age (%)                                            | 15.6                                                                                   | 16.5       | 16.9       | 19.7       | 21.2       |
| Nulliparous (%)                                                            | 25.7                                                                                   | 29.4       | 30.3       | 31.6       | 35.8       |
| Current oral contraceptive use (%)                                         | 9.0                                                                                    | 12.2       | 13.3       | 14.4       | 15.2       |
| Never used oral contraceptives (%)                                         | 17.2                                                                                   | 17.3       | 16.5       | 15.8       | 16.5       |
| History of benign breast disease (%)                                       | 30.9                                                                                   | 28.9       | 29.0       | 27.4       | 26.8       |
| History of breast cancer in mother and/or sister (%)                       | 6.3                                                                                    | 5.8        | 6.3        | 5.5        | 5.7        |
| Never smokers (%)                                                          | 72.0                                                                                   | 72.4       | 73.7       | 75.5       | 76.2       |
| No recent alcohol consumption (%)                                          | 29.4                                                                                   | 28.6       | 28.6       | 26.1       | 25.1       |
| Irregular menstrual cycles in high school (%)                              | 29.6                                                                                   | 28.4       | 28.5       | 29.3       | 29.7       |
| Average menstrual cycle length $\geq 40$ days between ages 18 and 22 y (%) | 8.6                                                                                    | 7.5        | 7.4        | 7.6        | 7.9        |
| Body mass index $>23.0$ at age 18 y (%)                                    | 25.2                                                                                   | 24.1       | 22.1       | 18.0       | 14.4       |
| Body mass index $>25.0$ in 1989 (%)                                        | 33.4                                                                                   | 32.0       | 31.6       | 29.5       | 24.5       |
| Weight gain $>10$ kg, age 18 y to 1989 (%)                                 | 31.9                                                                                   | 30.0       | 30.7       | 30.6       | 27.1       |
| Height $>67$ inches (%)                                                    | 13.4                                                                                   | 14.8       | 16.0       | 16.6       | 18.2       |

\*Participation in strenuous physical activity or sports at least twice per week.

**Table 2.** Characteristics of participants according to average level of recent (1989) moderate plus vigorous physical activity\* (h/wk)

| Characteristic                                                     | Average level of recent moderate plus vigorous physical activity (h/wk) |            |            |            |            |
|--------------------------------------------------------------------|-------------------------------------------------------------------------|------------|------------|------------|------------|
|                                                                    | <1                                                                      | 1–1.9      | 2–3.9      | 4–6.9      | ≥7         |
| No. of participants                                                | 35 573                                                                  | 18 005     | 22 233     | 13 570     | 15 087     |
| Mean age (standard deviation)                                      | 34.7 (4.6)                                                              | 34.4 (4.6) | 34.3 (4.6) | 34.2 (4.7) | 33.8 (4.8) |
| Menarche ≥14 y of age (%)                                          | 17.1                                                                    | 17.8       | 17.9       | 18.0       | 19.4       |
| Nulliparous (%)                                                    | 24.5                                                                    | 27.6       | 31.4       | 35.9       | 41.3       |
| Current oral contraceptive use (%)                                 | 11.0                                                                    | 12.6       | 13.4       | 13.4       | 16.1       |
| Never oral contraceptive use (%)                                   | 17.2                                                                    | 16.3       | 16.1       | 16.4       | 16.9       |
| History of benign breast disease (%)                               | 28.6                                                                    | 28.8       | 28.9       | 28.6       | 28.0       |
| History of breast cancer in mother and/or sister (%)               | 6.1                                                                     | 6.1        | 5.6        | 6.2        | 5.7        |
| Never smokers (%)                                                  | 74.7                                                                    | 75.0       | 73.4       | 72.7       | 72.6       |
| No recent alcohol consumption (%)                                  | 31.0                                                                    | 29.6       | 26.6       | 24.3       | 23.7       |
| Irregular menstrual cycles in high school (%)                      | 28.8                                                                    | 28.5       | 28.6       | 29.6       | 30.3       |
| Average menstrual cycle length ≥40 days between ages 18 and 22 (%) | 7.8                                                                     | 7.8        | 7.5        | 7.7        | 7.8        |
| Body mass index >23.0 at age 18 y (%)                              | 22.5                                                                    | 21.0       | 20.1       | 19.4       | 20.1       |
| Body mass index >25.0 in 1989 (%)                                  | 37.4                                                                    | 31.8       | 27.6       | 24.5       | 22.2       |
| Weight gain >10 kg, age 18 y to 1989 (%)                           | 38.1                                                                    | 31.9       | 26.9       | 22.9       | 21.0       |
| Height >67 inches (%)                                              | 14.7                                                                    | 15.8       | 16.1       | 16.3       | 17.1       |

associated with either late adolescent or recent physical activity level.

In age-adjusted analyses, the level of late adolescent physical activity was not associated with an increased risk of breast cancer in this cohort (Table 3). Adjustment for a variety of measured breast cancer risk factors changed the age-adjusted RRs little; all RRs remained close to a value of 1.0. When we examined the two separate physical activity variables that were averaged to derive the late adolescent physical activity variable (strenuous activity during high school and between ages 18 and 22 years), we found results nearly identical to those in Table 3. We investigated the possibility that the relationship between late adolescent physical activity and the risk of breast cancer might vary according to parity (nullipa-

rous versus parous), family history of breast cancer, history of benign breast disease, BMI at age 18 years (in tertiles), BMI in 1989 (in tertiles), and amount of weight change between age 18 years and 1989 (in tertiles). We found no meaningful differences in the association between late adolescent activity and breast cancer risk across strata of any of these variables (data not shown).

In age-adjusted analyses, average weekly hours of moderate plus vigorous physical activity (*see* Assessment of Physical Activity in “Methods”) in 1989 was also not associated with breast cancer risk (Table 4). Again, all RRs were close to a value of 1.0 and were unchanged by adjustment for measured breast cancer risk factors as well as level of late adolescent physical activity. We similarly

found no association between breast cancer risk and average weekly hours of total physical activity (light plus moderate plus vigorous) in 1989 or between risk and hours of vigorous activity only. To examine whether there was a reduction in breast cancer risk among the most active 5% of women in the cohort, we divided the highest moderate plus vigorous physical activity level into two finer levels. Again, we observed no association.

On the 1991 questionnaire, the same physical activity questions that appeared on the baseline 1989 survey were asked again. When we repeated the analyses described in the preceding paragraph using the average of 1989 and 1991 hours per week as the exposure of interest, again we found no association between physical activity and breast cancer risk; all patterns of RR closely resembled those reported in Table 4. Finally, we examined the joint pattern of physical activity from late adolescence and recent adulthood (1989). Compared with women who were in the lowest physical activity levels in both adolescence and recent adulthood, women who were in the highest activity levels at both these times had a RR of 1.0 (95% CI = 0.6–1.5).

If physical activity influences breast cancer risk by modifying ovarian hormone levels, this effect may be obscured by the use of oral contraceptives. We hy-

**Table 3.** Average level of vigorous physical activity during high school and between ages 18 and 22 years and relative risks (RRs) of breast cancer (95% confidence intervals [CIs])

|            | Person-years of observation<br>(N = 518 297) | No. of subjects with breast cancer<br>(N = 372) | Age-adjusted RR (CI) | Multivariate-adjusted*<br>RR (CI) |
|------------|----------------------------------------------|-------------------------------------------------|----------------------|-----------------------------------|
| Never      | 90 489                                       | 77                                              | 1.0                  | 1.0                               |
| 1–3 mo/y   | 109 639                                      | 70                                              | 0.9 (0.6–1.2)        | 0.9 (0.6–1.2)                     |
| 4–6 mo/y   | 126 440                                      | 93                                              | 1.1 (0.8–1.4)        | 1.1 (0.8–1.4)                     |
| 7–9 mo/y   | 112 962                                      | 78                                              | 1.1 (0.8–1.5)        | 1.1 (0.8–1.5)                     |
| 10–12 mo/y | 78 768                                       | 54                                              | 1.1 (0.8–1.6)        | 1.1 (0.8–1.6)                     |

\*Estimates adjusted for age at baseline, age at menarche, history of benign breast disease, history of breast cancer in mother and/or sister, recent alcohol consumption, height, oral contraceptive history, and parity and age at first birth (combination variable).

**Table 4.** Average hours per week of recent (1989) moderate plus vigorous physical activity and relative risk (RR) of breast cancer (95% confidence interval [CIs])

|              | Person-years of observation<br>(N = 518 297) | No. of subjects with breast cancer<br>(N = 372) | Age-adjusted RR (CI) | Multivariate-adjusted*<br>RR (CI) |
|--------------|----------------------------------------------|-------------------------------------------------|----------------------|-----------------------------------|
| <1 h/wk      | 174 787                                      | 124                                             | 1.0                  | 1.0                               |
| 1.0–1.9 h/wk | 89 896                                       | 65                                              | 1.1 (0.8–1.4)        | 1.1 (0.8–1.4)                     |
| 2.0–3.9 h/wk | 111 716                                      | 82                                              | 1.1 (0.8–1.4)        | 1.1 (0.8–1.4)                     |
| 4.0–6.9 h/wk | 68 399                                       | 48                                              | 1.0 (0.8–1.5)        | 1.0 (0.7–1.4)                     |
| ≥7.0 h/wk    | 73 499                                       | 53                                              | 1.1 (0.8–1.6)        | 1.1 (0.8–1.5)                     |

\*Estimates adjusted for age at baseline, age at menarche, history of benign breast disease, history of breast cancer in mother/sister, recent alcohol consumption, height, oral contraceptive history, and parity and age at first birth (combination variable).

pothesized that women who have not used oral contraceptives or who have used them for a very limited period of time might be more susceptible to any effect of physical activity on breast cancer risk. To address this hypothesis, we repeated analyses within strata of oral contraceptive use. Among women who had never used oral contraceptives or among those who had used them for less than 2 years ( $n = 141$ ), RRs for all levels of the activity measures were indistinguishable from 1.0, although CIs were obviously wider (data not shown).

## Discussion

In this large prospective study composed primarily of premenopausal women, we found little evidence for a decreased risk of breast cancer associated with either physical activity in late adolescence or recent physical activity. These findings remained unchanged after adjustment for different breast cancer risk factors and remained remarkably consistent across different definitions and categorizations of physical activity level.

If the underlying hypothesized mechanism(s) about how physical activity should affect breast cancer risk are sound, how can our overall null findings be explained? If substantial reduction in the number of ovulatory cycles is the primary mechanism by which physical activity reduces breast cancer risk, then exercise equivalent to daily competitive athletic training may be required to affect risk (6). It is unlikely that many of even the most active women in our sample were engaged in such strenuous activity. Although we cannot rule out errors in recall, our data show that there were no differences in reported menstrual cycle irregularity early in life across the levels of

early physical activity. As McTiernan (22) notes, however, in the epidemiologic studies that have shown that a reduced risk of breast cancer is associated with exercise, it is similarly unlikely that the most active women were engaging in competitive athletic training. She concluded that delayed onset and decreased numbers of ovulatory cycles cannot be the only explanation for the observed association between exercise and breast cancer. In postmenopausal women, physical activity has been hypothesized to reduce breast cancer risk in part by reducing fat stores, and thus endogenous estrogen levels. However, among premenopausal women in high-risk countries, higher levels of adiposity have been consistently associated with a reduced risk of breast cancer (23). Although there are currently no proven mechanisms to explain this inverse association, it is plausible that physical activity conveys less protection against breast cancer in premenopausal than in postmenopausal women. However, Thune et al. (10) found that the protective effect of physical activity was stronger in premenopausal women than in postmenopausal women, and Bernstein et al. (9) showed a strong inverse association for a sample of women aged 40 years and younger.

It is possible that error in our measurement of physical activity levels could have attenuated a real protective effect of activity in these data. In particular, long-term recall of physical activity during late adolescence may be difficult. Although we cannot completely exclude this possibility, we have good evidence that our measures of activity were informative with regard to the specified time periods. The measures correlate as expected with age at menarche, BMI at age 18 years, current BMI, and weight gain. Although

we obtained no validation data on the measure of late adolescent physical activity, in a validation study of the instrument used to assess recent activity (24), the Pearson correlation coefficient between physical activity reported in 7-day diaries (mailed out at intervals of 3 months over the course of a year) and the questions used on the 1989 survey were relatively high (.62) for a representative sample of women. This physical activity assessment instrument has been shown to be predictive of several disease outcomes, including noninsulin-dependent diabetes mellitus in women (25), colon cancer in men and women (26,27), and gallstones in men (28).

Currently, there is no consensus regarding the critical time period in which to measure physical activity in terms of its effect on breast cancer risk. Physical activity at a certain time in life may exert different effects on premenopausal versus postmenopausal breast cancer risk, because the associations between weight (and weight gain) and breast cancer risk may vary by menopausal status (23,29). Furthermore, if the critical exposure of interest is the lifelong physical activity pattern, as suggested by Bernstein et al. (9), then our assessment of physical activity level pertaining to only two limited time periods will result in misclassification in terms of the true exposure of interest. The women in our study showed considerable variability in physical activity over even short periods of time. For example, when we compared responses for high school and ages 18–22 years, less than half (44.6%) of the women in our study gave the same answer to the question, “How many months per year did you engage in strenuous physical activity at least two times per week”? Of those who answered “10–12 months” for the years spent in high school, only 30% gave this answer for the age period 18–22 years. Of those most physically active in late adolescence (according to the averaged high school and age 18–22-year measure), only 27% were in the highest level of moderate plus vigorous activity in 1989, and nearly 20% of those most physically active in late adolescence were in the least active category in 1989. Considering the short time interval of 1989 to 1991, only 39% of the women remained in the same moderate plus vigorous activity level (based on number of hours of physical activity/

week) on the two questionnaires. Of those most active in 1989, only 20% remained in the most active level in 1991, while 25% of those most active in 1989 had dropped to the least active group in 1991. Thus, no one of our measures could be taken as reflective of lifelong physical activity, and to crudely average them would ignore the sometimes substantial gap in time between ages 18 and 22 years and 1989. However, in most of the other studies (10,11,14,16,17) in which inverse associations were observed, the physical activity assessment method was not more detailed than ours and did not assess lifetime activity.

In summary, we found no support for the hypothesis that higher levels of physical activity in late adolescence or in recent adulthood reduces premenopausal breast cancer risk. The inconsistency in epidemiologic findings, however, demands a more detailed examination of physical activity throughout life in relation to both premenopausal and postmenopausal breast cancer. As noted by a recent review of this topic (30), future studies should focus on improving assessment of lifetime physical activity from all sources to clarify whether there is a dose-response relationship or an optimal time period, frequency, or intensity of physical activity with respect to reducing breast cancer risk.

## References

- (1) Feicht CB, Johnson TS, Martin BJ, Sparkes KE, Wagner WW Jr. Secondary amenorrhoea in athletes. *Lancet* 1978;2:1145-6.
- (2) Frisch RE, Wyshak G, Vincent L. Delayed menarche and amenorrhea in ballet dancers. *N Engl J Med* 1980;303:17-9.
- (3) Frisch RE, Gotz-Welbergen AV, McArthur JW, Albright T, Witschi J, Bullen B, et al. Delayed menarche and amenorrhea of college athletes in relation to age at onset of training. *JAMA* 1981;246:1559-63.
- (4) Russell JB, Mitchell D, Musey PI, Collins DC. The relationship of exercise to anovulatory cycles in female athletes: hormonal and physical characteristics. *Obstet Gynecol* 1984;63:452-6.
- (5) Broocks A, Pirke KM, Schweiger U, Tuschl RJ, Laessle RG, Strowitzki T, et al. Cyclic ovarian function in recreational athletes. *J Appl Physiol* 1990;68:2083-6.
- (6) Bullen BA, Skrinar GS, Beitins IZ, von Mering G, Turnbull BA, McArthur JW. Induction of menstrual disorders by strenuous exercise in untrained women. *N Engl J Med* 1985;312:1349-53.
- (7) Siiteri PK. Adipose tissue as a source of hormones. *Am J Clin Nutr* 1987;45(1 Suppl):277-82.
- (8) Cauley JA, Gutai JP, Kuller LH, LeDonne D, Powell JG. The epidemiology of serum sex hormones in postmenopausal women. *Am J Epidemiol* 1989;129:1120-31.
- (9) Bernstein L, Henderson BE, Hanisch R, Sullivan-Halley J, Ross RK. Physical exercise and reduced risk of breast cancer in young women. *J Natl Cancer Inst* 1994;86:1403-8.
- (10) Thune I, Brenn T, Lund E, Gaard M. Physical activity and the risk of breast cancer. *N Engl J Med* 1997;336:1269-75.
- (11) Mittendorf R, Longnecker MP, Newcomb PA, Dietz AT, Greenberg ER, Bogdan GF, et al. Strenuous physical activity in young adulthood and risk of breast cancer (United States). *Cancer Causes Control* 1995;5:347-53.
- (12) Frisch RE, Wyshak G, Albright NL, Albright TE, Schiff I, Witschi J, et al. Lower lifetime occurrence of breast cancer and cancers of the reproductive system among former college athletes. *Am J Clin Nutr* 1987;45(1 Suppl):328-35.
- (13) Paffenbarger RS Jr, Hyde RT, Wing AL. Physical activity and incidence of cancer in diverse populations: a preliminary report. *Am J Clin Nutr* 1987;45(1 Suppl):312-7.
- (14) Friedenreich CM, Rohan TE. Physical activity and risk of breast cancer. *Eur J Cancer Prev* 1995;4:145-51.
- (15) Dorgan JF, Brown C, Barrett M, Splansky GL, Kreger BE, D'Agostino RB, et al. Physical activity and risk of breast cancer in the Framingham Heart Study. *Am J Epidemiol* 1994;139:662-9.
- (16) Albanes D, Blair A, Taylor PR. Physical activity and risk of cancer in the NHANES I population. *Am J Public Health* 1989;79:744-50.
- (17) D'Avanzo B, Nanni O, La Vecchia C, Franceschi S, Negri E, Giacosa A, et al. Physical activity and breast cancer risk. *Cancer Epidemiol Biomarkers Prev* 1996;5:155-60.
- (18) Chen CL, White E, Malone KE, Daling JR. Leisure-time physical activity in relation to breast cancer among young women (Washington, United States). *Cancer Causes Control* 1997;8:77-84.
- (19) McTiernan A, Stanford JL, Weiss NS, Daling JR, Voigt LF. Occurrence of breast cancer in relation to recreational exercise in women age 50-64 years. *Epidemiology* 1996;7:598-604.
- (20) Troy LM, Hunter DJ, Manson JE, Colditz GA, Stampfer MJ, Willett WC. The validity of recalled weight among younger women. *Int J Obes Relat Metab Disord* 1995;19:570-2.
- (21) Rimm EB, Stampfer MJ, Colditz GA, Chute CG, Litin LB, Willett WC. Validity of self-reported waist and hip circumferences in men and women [editorial]. *Epidemiology* 1990;1:466-73.
- (22) McTiernan A. Exercise and breast cancer-time to get moving? *N Engl J Med* 1996;336:1311-2.
- (23) Hunter DJ, Willett WC. Diet, body size, and breast cancer. *Epidemiol Rev* 1993;15:110-32.
- (24) Wolf AM, Hunter DJ, Colditz GA, Manson JE, Stampfer MJ, Corsano KA, et al. Reproducibility and validity of a self-administered physical activity questionnaire. *Int J Epidemiol* 1994;23:991-9.
- (25) Sigal RJ, Rich-Edwards JW, Solomon CG, Colditz GA, Stampfer MJ, Willett WC, et al. A prospective study of physical activity and risk of non-insulin-dependent diabetes mellitus (NIDDM) in women [abstract]. *Am J Epidemiol* 1996;143:S73.
- (26) Giovannucci E, Ascherio A, Rimm EB, Colditz GA, Stampfer MJ, Willett WC. Physical activity, obesity, and risk for colon cancer and adenoma in men. *Ann Intern Med* 1995;122:327-34.
- (27) Martinez ME, Giovannucci E, Spiegelman D, Hunter DJ, Willett WC, Colditz GA. Leisure-time physical activity, body size, and colon cancer in women. *Nurses' Health Study Research Group. J Natl Cancer Inst* 1997;89:948-55.
- (28) Leitzmann MF, Giovannucci EL, Rimm EB, Stampfer MJ, Spiegelman D, Wing AL, Willett WC. The relation of physical activity to risk for symptomatic gallstone disease in men. *Ann Intern Med* 1998;128:417-25.
- (29) London SJ, Colditz GA, Stampfer MJ, Willett WC, Rosner B, Speizer FE. A prospective study of relative weight, height, and risk of breast cancer. *JAMA* 1989;262:2853-8.
- (30) Gammon MD, John EM, Britton JA. Recreational and occupational physical activities and risk of breast cancer. *J Natl Cancer Inst* 1998;90:100-17.

## Notes

Supported by Public Health Service grants CA57711 (B. Rockhill) and CA50838 from the National Cancer Institute, National Institutes of Health, Department of Health and Human Services.

Manuscript received February 6, 1998; revised May 14, 1998; accepted June 4, 1998.

## Availability of PSC833, a Substrate and Inhibitor of P-glycoproteins, in Various Concentrations of Serum

Alexander J. Smith, Ulrich Mayer, Alfred H. Schinkel, Piet Borst\*

**Background:** P-glycoproteins are membrane-associated transporters that can render cells resistant to a variety of chemotherapeutic drugs. Reversal agents are (preferably nontoxic) drugs that can inhibit these P-glycoproteins and thereby overcome multidrug resistance. PSC833, a cyclosporin A analog, is a reversal agent that has shown potential in *in vitro* experiments and in clinical trials. We tested PSC833 to determine whether it is a transported substrate of human and murine P-glycoproteins associated with multidrug resistance (encoded by the human MDR1 gene and its murine homolog, *mdr1a*) and whether it can completely inhibit these P-glycoproteins under simulated *in vivo* conditions. **Methods:** Monolayers of polarized LLC-PK1 pig kidney cells transfected with complementary DNA containing either MDR1 or *mdr1a* sequences were used to measure the directional transport of P-glycoprotein substrates under various serum conditions. **Results:** In contrast to two previous studies, we found that PSC833 is transported by both the MDR1 and the *mdr1a* P-glycoproteins, albeit at a low rate. PSC833 has a very high affinity for the MDR1 P-glycoprotein, and its Michaelis constant ( $K_m$ ) for transport is 50 nM, fourfold lower than for cyclosporin A. Inhibition of drug transport by PSC833 is approximately eightfold less effective in 100% fetal bovine serum than in tissue culture medium containing 10% serum. The concentration of PSC833 necessary to fully inhibit transport of digoxin and paclitaxel (Taxol) under complete (i.e., 100%) serum conditions is higher than the plasma concentrations achieved in clinical trials. **Conclusions:** Although PSC833 binds effi-

ciently to the MDR1 P-glycoprotein and is released only sluggishly, the high concentrations of PSC833 necessary to inhibit this P-glycoprotein under complete serum conditions in our *in vitro* system suggest that it may be difficult for PSC833 alone to produce total inhibition of P-glycoprotein activity in patients. [J Natl Cancer Inst 1998;90:1161-6]

Mammalian cells can become resistant to several chemotherapeutic drugs after selection with a single drug *in vivo* or *in vitro*. This multidrug resistance can be caused by P-glycoproteins (P-gps) (1,2) encoded by the human multiple drug resistance 1 (MDR1) gene and the murine *mdr1a* and *mdr1b* genes (also known as *mdr3* and *mdr1*, respectively). P-gps are cell membrane proteins that render cells resistant to cytotoxic drugs by actively extruding drugs from the cytoplasm into the extracellular space, resulting in a decreased drug concentration inside the cell (3-6).

P-gp-mediated multidrug resistance can be overcome by coadministration of reversal agents that act as inhibitors of P-gps, such as verapamil and cyclosporin A (CsA) (7-9). Reversal agents are effective *in vitro*, but trials testing the inhibition of multidrug resistance in tumors of patients have often given disappointing results (10-12) because of the dose-limiting side effects of these agents. Hence, the current interest in second-generation agents with more favorable characteristics. One of the most effective of these is PSC833, a nonimmunosuppressive analog of CsA (13,14). PSC833 can completely inhibit human P-gp *in vitro* at concentrations that can be tolerated *in vivo* and is being tested in clinical trials (15,16).

In studies with wild-type mice and mice homozygous for a disruption of the *mdr1a* and *mdr1b* genes (*mdr1a/b* [-/-] mice) (17), we noted that the maximal concentrations of PSC833 tolerated failed to completely inhibit P-gp in the blood-brain barrier (18). In the same study, we found that PSC833 appears to be actively transported out of the brain in mice with functional P-gp. Analogous observations were made by Lemaire et al. (19) in rats. These results are in contrast with some *in*

*vitro* studies that reported that PSC833 is not transported by P-gp (20,21).

To resolve the discrepancies between our work and previous studies, we analyzed the behavior of PSC833 in monolayers of polarized kidney cells transfected with P-gp genes (22). Transport of compounds through this monolayer can be measured with high sensitivity and the ability of PSC833 to inhibit drug transport can be tested under conditions more resembling the *in vivo* situation (i.e., in complete serum rather than the 10% serum normally used for studying reversal agents *in vitro*).

## Materials and Methods

[12 $\alpha$ -<sup>3</sup>H(N)]digoxin (0.40 GBq/mmol) and [<sup>3</sup>H(G)]daunorubicin (0.12 GBq/mmol) were obtained from Du Pont NEN, Boston, MA; inulin [<sup>14</sup>C]carboxylic acid (molecular weight approximately 5200) was obtained from Amersham Life Science Inc., Arlington Heights, IL; [<sup>3</sup>H]paclitaxel (0.31 GBq/mmol) was obtained from Moravsek Biochemicals, Inc., La Brea, CA; L-[1-<sup>14</sup>C]Val<sup>7</sup> SDZ PSC833 (1.47 MBq/mmol) was from Sandoz Pharma Ltd. (now Novartis Pharma Inc.), Basel, Switzerland; SDZ PSC833 was from Sandoz Pharma Nederland B.V., Uden, The Netherlands; all tissue culture materials were from GIBCO BRL, Paisley, Scotland; and other chemicals were from Sigma Chemical Co., St. Louis, MO.

## Tissue Culture

The LLC-PK1 pig kidney epithelial cells (American Type Culture Collection, Manassas, VA) were cultured in M199 medium supplemented with 50 U of penicillin/mL, 50  $\mu$ g of streptomycin/mL, and 10% fetal bovine serum (FBS) at 37 °C in 5% CO<sub>2</sub>. The cells were trypsinized and subcultured every 3-4 days. The MDR1- and *mdr1a*-transfected clones of LLC-PK1 (22) were maintained routinely in the absence of drugs and tested for P-gp content on protein immunoblots regularly as described previously (22,23).

## Transport Assays

Drug transport assays were generally performed as described previously (22,24). Cells were seeded on microporous polycarbonate membrane filters (pore size 3.0  $\mu$ m, diameter 24.5 mm, Transwell™, Corning Costar Corp., Cambridge, MA) at a density of 1.5–2  $\times$  10<sup>6</sup> cells per well. The cells were grown

\*Affiliation of authors: Division of Molecular Biology, The Netherlands Cancer Institute, Amsterdam.

Correspondence to: Piet Borst, M.D., Division of Molecular Biology, The Netherlands Cancer Institute, Plesmanlaan 121, 1066 CX Amsterdam, The Netherlands.

See "Notes" following "References."

© Oxford University Press

in complete medium, with a fresh medium replacement the day after seeding, and reached confluency after 3 days. The paracellular flow was monitored during transport experiments by the appearance of inulin [ $^{14}\text{C}$ ]carboxylic acid (0.025  $\mu\text{Ci/mL}$ , 4.2  $\mu\text{M}$ ) in the opposite compartment and was always less than 1.5% of total radioactivity per hour. One hour before the start of the experiment, medium on both sides of the monolayer was replaced. The experiment was started by replacing the medium on either the apical or the basolateral side by medium containing [ $^{14}\text{C}$ ]PSC833 (54.5  $\mu\text{Ci}/\mu\text{mol}$ ). The cells were incubated at 37°C in 5%  $\text{CO}_2$ , and aliquots were taken from both compartments at 1, 2, 3, and 4 hours. The appearance of radioactivity in the opposite compartment was measured and presented as the fraction of total radioactivity added at the beginning of the experiment. Directional transport was measured in duplicate and the range is shown.

Inhibition of drug transport by PSC833 was measured similarly. One hour before the start of the experiment, the medium on both sides of the monolayer was replaced with complete medium (including 10% FBS) or with 100% FBS containing the appropriate concentration of PSC833. Digoxin, paclitaxel (Taxol; Sigma Chemical Co., St. Louis, MO), and PSC833 were added as solutions in 96% ethanol. When required, extra ethanol was added to exclude an effect of the solvent. At the start of the experiment, the serum or medium in one of the compartments was replaced by serum or medium with 2  $\mu\text{M}$  [ $^3\text{H}$ ]digoxin, 2  $\mu\text{M}$  [ $^3\text{H}$ ]daunorubicin, or 2  $\mu\text{M}$  [ $^3\text{H}$ ]paclitaxel (0.25  $\mu\text{Ci/mL}$ ) and the required amount of PSC833. Samples were taken as described above. These experiments could not be done

with human blood plasma instead of FBS because the tight kidney cell monolayers started to leak as soon as the plasma was added.

The ability of the cells to accumulate drugs at one side of the monolayer was measured by adding 2 mL of medium containing equal concentrations of (radioactive) drug to both sides of the monolayer. At 1, 2, 3, 4, and 8 hours, 50- $\mu\text{L}$  samples were taken and the amount of drug in each compartment was determined. If the drug is transported actively by P-gp, the amount of drug in the apical compartment should increase as the amount of drug in the basolateral compartment decreases. A concentration gradient is thus formed and maintained.

### Statistics

In the transport experiments, two replicate slopes were measured per experiment. Statistical analysis of the experiments was performed by a one-way analysis of variance approach with the individual slopes as experimental units. The slope of the line through the four time points of each well was determined, resulting in two independent estimations of the slope per experiment. Because we assumed that the random variation of the slope was equal in all experiments, we used the differences between the two independent estimations of all experiments to determine this random variation. All  $P$  values are two-sided. Differences are considered significant if  $P < .05$ .

### Calculations

An estimation of transport kinetics of PSC833 was derived by making the following simplifying

assumptions. 1) Active transport in the parent cell line is negligible as shown in Fig. 1. 2) The apical and basolateral membranes are comparable in surface and permeability. On expression of MDR1, the increase in the flux from basolateral to apical is approximately equal to the decrease in the flux from apical to basolateral, indicating that there is no large difference in the amount of drug that can diffuse through the two membranes over time. 3) Free PSC833 is homogeneously present inside the cell. Obviously, a significant part of the intracellular PSC833 will insert in intracellular membranes, but this drug will not be available for inhibition; our calculations only concern free PSC833, available for inhibition of P-gp. 4) Drug flow is linear over 4 hours. After a short initial accumulation period, the drug concentration inside the cell reaches a constant value. During this intracellular steady state, the following equation applies:

$$\text{Influx} = (\text{efflux})^{\text{apically}} + (\text{efflux})^{\text{basolaterally}}$$

$$k[P]_o = [(k[P]_i)_A + (V_{\max}[P]_i)/(K_m + [P]_i)] + (k[P]_i)_B$$

in which  $k$  is the passive permeation coefficient (L per minute/well),  $[P]_o$  is the PSC833 concentration added to the medium (mol/L),  $[P]_i$  is the free PSC833 concentration inside the cell (mol/L),  $k[P]_o$  is the passive influx (mol per minute/well),  $(k[P]_i)_A$  is the passive efflux apically (mol per minute/well),  $(k[P]_i)_B$  is the passive efflux basally (mol per minute/well),  $(V_{\max}[P]_i)/(K_m + [P]_i)$  is the active efflux (mol per minute/well),  $V_{\max}$  is the maximum velocity, and  $K_m$  is the Michaelis constant.

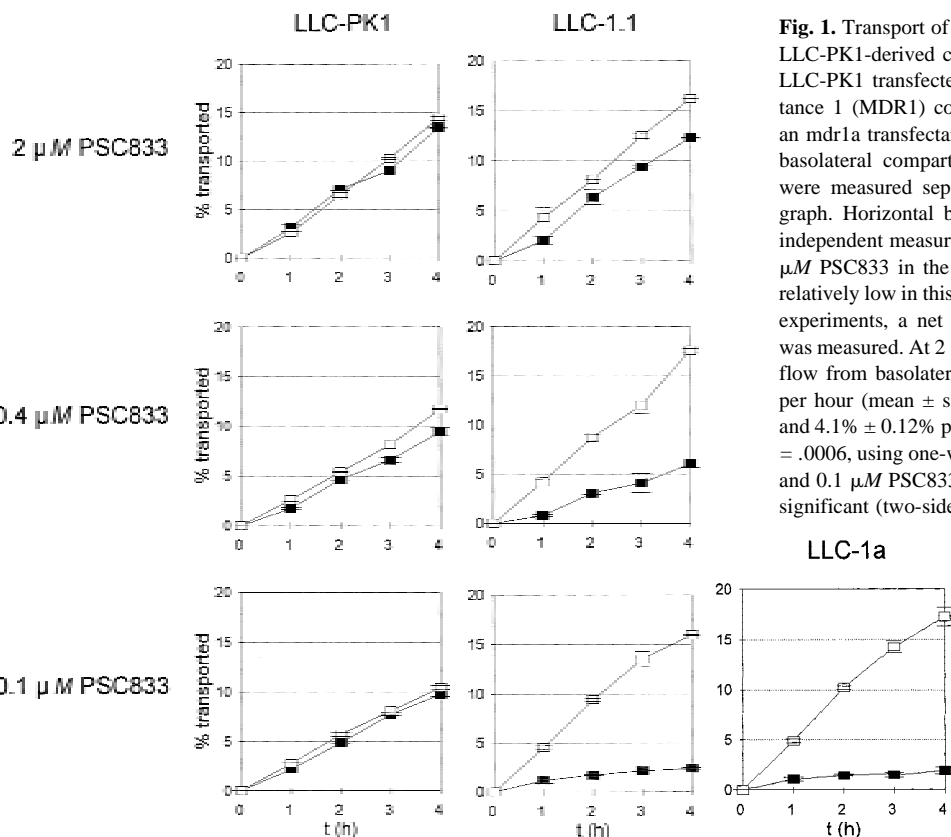

**Fig. 1.** Transport of PSC833 through monolayers of LLC-PK1-derived cell lines. LLC-1.1 is a clone of LLC-PK1 transfected with the multiple drug resistance 1 (MDR1) complementary DNA; LLC-1a is an *mdr1a* transfectant. Flows from the apical to the basolateral compartment (■) and vice versa (□) were measured separately and plotted in a single graph. Horizontal bars indicate the values of two independent measurements. The net transport of 0.1  $\mu\text{M}$  PSC833 in the parent cell line LLC-PK1 was relatively low in this experiment (<1%); in two other experiments, a net transport of approximately 3% was measured. At 2  $\mu\text{M}$  PSC833, the rate of PSC833 flow from basolateral to apical was  $3.4\% \pm 0.12\%$  per hour (mean  $\pm$  standard deviation) in LLC-PK1 and  $4.1\% \pm 0.12\%$  per hour in LLC-1.1 (two-sided  $P = .0006$ , using one-way analysis of variance). At 0.4 and 0.1  $\mu\text{M}$  PSC833, the difference was even more significant (two-sided  $P < .0001$ ). The difference between the flow rates in the two directions was significantly higher in the MDR1-transfected cells than in the parent cell line (two-sided  $P = .0008$  at 2  $\mu\text{M}$ ; two-sided  $P < .0001$  at 0.4 and 0.1  $\mu\text{M}$  PSC833) using one-way analysis of variance.



In the parent cell line LLC-PK1, active transport of 2  $\mu$ M PSC833 is negligible and thus:

$$k[P]_o = (k[P]_i)_A + (k[P]_i)_B \rightarrow [P]_o = 2[P]_i \\ \rightarrow [P]_i = 1 \mu M.$$

From the graph (Fig. 1; LLC-PK1, 2  $\mu$ M PSC833) it can be deduced that  $k[P]_i = 14.7\% \times 2 \mu M \times 2 \text{ mL} \times (240 \text{ minutes})^{-1} \times \text{well}^{-1} = 2.45 \times 10^{-12} \text{ mol per minute/well}$ .

$$k = 2.45 \times 10^{-6} \text{ L per minute/well}.$$

This passive permeation coefficient will also be valid for the transfected LLC-PK1 cell lines with this concentration of drug. At lower drug concentrations, this value tends to decrease, possibly because at these very low concentrations relatively more PSC833 may bind to the material of the wells.

$(k[P]_i)_B$  is the flux to the basal compartment in the assay. The value of  $(k[P]_i)_B$  can be obtained from the data in Fig. 1 for LLC-1.1 cells; the value of  $k$  is calculated from the data in Fig. 1 for LLC-PK1 cells as above and will not depend on the cell type. These two values can be used to calculate the drug concentration in the MDR1-transfected cells:  $[P]_i = (k[P]_i)_B/k$  (Table 1).

The active transport  $[(V_{max} \cdot [P]_i)/(K_m + [P]_i)]$  is the total flux to the apical compartment minus the passive diffusion to the apical compartment. Because the apical and basolateral membranes are assumed equal, the passive efflux to either side will be equal. Therefore, the active transport is the net difference between the flux from basolateral to apical and vice versa in a transport experiment.

Results

[14C]PSC833 Transport by P-gps

Fig. 1 shows the PSC833 transport rate at three concentrations of [14C]PSC833 through monolayers of LLC-PK1-derived cell lines. At all concentrations, the fractional transport to the apical compartment is significantly higher in the MDR1-transfected cell line LLC-1.1 than in the parent cells, whereas the fractional transport in the opposite direction is correspondingly lower. Vectorial transport is due to the presence of MDR1 P-gp in the apical membrane of the transfected cells (22,24). Net transport of PSC833 through the monolayers of the mdrl1a-transfected cell line LLC-1a is as high as through monolayers of the MDR1 transfectant, showing that the reversal agent is a substrate of both MDR1 and mdrl1a P-gp.

To test whether PSC833 transport by P-gp can take place against a concentration gradient, we measured the distribution of PSC833 in the two compartments, with 0.05  $\mu$ M PSC833 initially on both sides of the monolayer. After 8 hours, 65% of the PSC833 accumulated in the apical compartment and 30% was in the

Table 1. Calculated kinetic values of PSC833 transport through monolayers of MDR1-transfected LLC-1.1 cells after 4 hours\*

| [P] <sub>o</sub> , $\mu$ mol/L | (k[P] <sub>i</sub> ) <sub>B</sub> |                   | [P] <sub>i</sub> , $\mu$ mol/L | $\frac{V_{max} \cdot [P]_i}{K_m + [P]_i}$ |                   |
|--------------------------------|-----------------------------------|-------------------|--------------------------------|-------------------------------------------|-------------------|
|                                | % per 4 h                         | pmol/min per well |                                | % per 4 h                                 | pmol/min per well |
| 2                              | 12.3                              | 2.05              | $8.8 \times 10^{-1}$           | 3.9                                       | 0.633             |
| 0.4                            | 6.05                              | 0.202             | $1.1 \times 10^{-1}$           | 11.54                                     | 0.385             |
| 0.2                            | 4.24                              | 0.0707            | $3.6 \times 10^{-2}$           | 13.43                                     | 0.224             |
| 0.1                            | 2.41                              | 0.0201            | $1.0 \times 10^{-2}$           | 13.51                                     | 0.113             |

\*[P]<sub>o</sub> is the PSC833 concentration in the medium; (k[P]<sub>i</sub>)<sub>B</sub> is the passive efflux of PSC833 to the basolateral compartment; [P]<sub>i</sub> is the intracellular PSC833 concentration; and (V<sub>max</sub>[P]<sub>i</sub>)/(K<sub>m</sub> + [P]<sub>i</sub>) is the active transport of PSC833 to the apical compartment.

basolateral compartment, demonstrating that MDR1 P-gp can transport this substrate against a concentration gradient (results not shown).

Table 1 presents our calculated values for PSC833 transport kinetics in the MDR1 transfectant LLC-1.1 (see ‘‘Materials and Methods’’ for details). The estimated K<sub>m</sub> and V<sub>max</sub> values for transport of PSC833 by MDR1 in the LLC-1.1 cell line are 50 nM and 0.6 pmol per minute/well, respectively. A comparable analysis of CsA transport gave a K<sub>m</sub> of 200 nM and a V<sub>max</sub> of 11 pmol per minute/well.

The K<sub>m</sub> for transport of daunorubicin was reported to be 1–2  $\mu$ M (25). Comparison of the reported values for the V<sub>max</sub> in different systems is not meaningful because these values are dependent on the transport assay system used.

Inhibition of Drug Transport by PSC833 in Culture Medium and in Serum

A recent *in vivo* study (18) with mice suggested that the inhibition of mdrl1a P-gp by PSC833 may be incomplete even at high plasma concentrations of the drug.

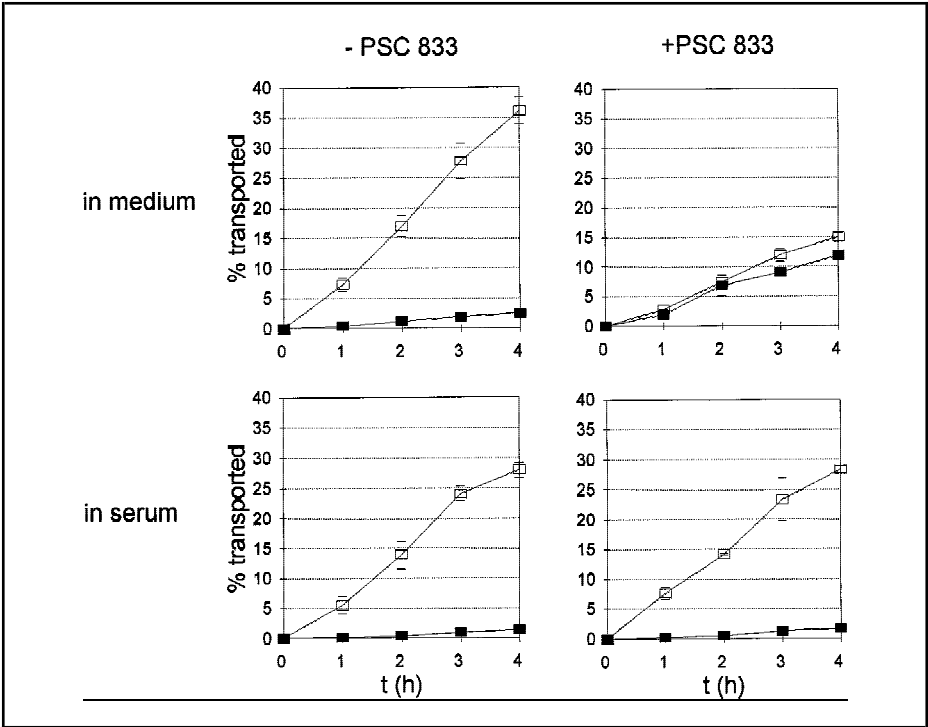

Fig. 2. Inhibition by 1  $\mu$ M PSC833 of digoxin transport through monolayers of LLC-1.1 cells in tissue culture medium and 100% fetal bovine serum (FBS). Flows from the apical to the basolateral compartment (■) and vice versa (□) were measured separately and plotted in a single graph. Horizontal bars indicate the values of two independent measurements. The inhibition of digoxin transport by 1  $\mu$ M PSC833 was highly significant in medium (two-sided  $P < .0001$  versus medium without PSC833 using one-way analysis of variance) and not significant in 100% FBS (two-sided  $P = .79$  versus serum without PSC833).

Because comparable concentrations of PSC833 can completely inhibit P-gp activity in cultured cells in tissue culture medium (26), it seemed possible that the differences between *in vitro* and *in vivo* results could be due to extensive binding of PSC833 to serum components. We therefore compared inhibition of drug transport by PSC833 in tissue culture medium (containing 10% FBS) and in 100% FBS. Fig. 2 shows that the transport rate of the substrate drug digoxin (22,24,27) through monolayers of LLC-1.1 cells is not significantly affected in 100% FBS compared with tissue culture medium. Addition of 1  $\mu\text{M}$  PSC833, a concentration that gives a complete inhibition in tissue culture medium, does not significantly inhibit digoxin transport in 100% FBS, showing that PSC833 is less effective in 100% serum than in tissue culture medium.

The inhibitory activity of PSC833 in serum-free medium, in normal medium (containing 10% FBS), and in 100% FBS on the transport of digoxin, daunorubicin, and paclitaxel is shown in Fig. 3. The concentrations of PSC833 that inhibit drug transport by 50% (i.e., its  $\text{IC}_{50}$ ) in 100% serum are 3.0, 1.5, and 5.7  $\mu\text{M}$  for digoxin, daunorubicin, and paclitaxel, respectively. These  $\text{IC}_{50}$  values are eight-fold to ninefold higher than the values in normal tissue culture medium. In medium without any serum, the  $\text{IC}_{50}$  value for digoxin transport is 23-fold lower than in 100% serum (Fig. 3, A).

## Discussion

Our results show that both MDR1 P-gp and *mdr1a* P-gp can transport PSC833 against a concentration gradient, although the transport rate is low (Fig. 1). The MDR1 P-gp has a high affinity for PSC833, as would be expected for such a potent reversal agent. The  $K_m$  of MDR1 P-gp for CsA, the parent drug of PSC833, is approximately 200 nM in our system, fourfold higher than for PSC833. The maximal transport rate of PSC833 is 0.6 pmol per minute/well, whereas CsA can be transported at a rate almost 20 times higher.

The high affinity of PSC833 for P-gp and its low maximal transport rate are probably the reason why PSC833 is a better reversal agent than CsA. Both reversal agents bind to P-gp with high affinity, but

**Fig. 3.** Inhibitory activity of PSC833 on transport of digoxin (A), daunorubicin (B), and paclitaxel (Taxol) (C) in 100% fetal bovine serum ( $\square$ , FBS), in tissue culture medium with 10% FBS ( $\blacksquare$ ), and in serum-free medium ( $\blacklozenge$ , digoxin only). The net transport rate of the drugs in the absence of the inhibitor is set at 100% transport, identical flow rates from the apical to the basolateral side and vice versa due to passive drug flow are set at 0% transport.

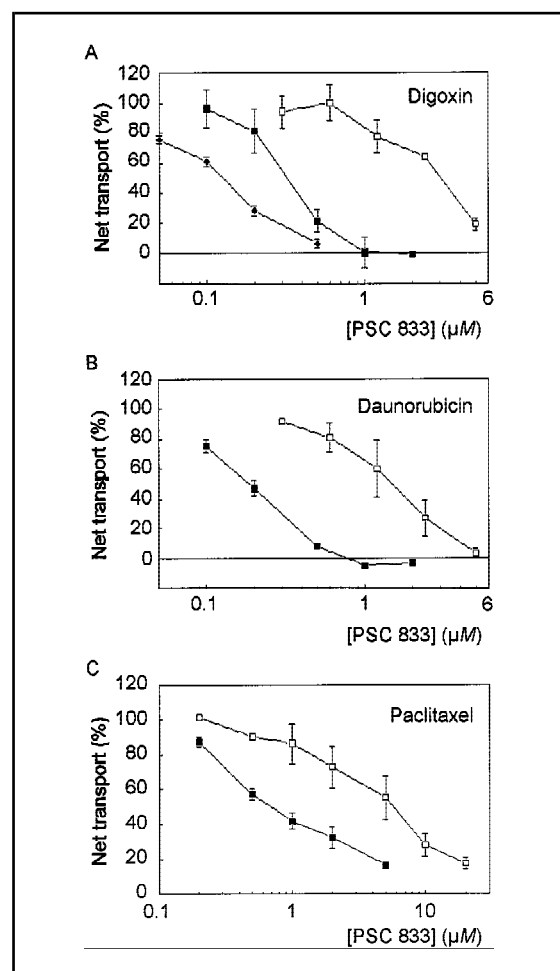

the actual transport of PSC833 is much slower and thus PSC833 will occupy the P-gp molecule longer during transport. The rate of passive diffusion of CsA and PSC833 through the parent cell line LLC-PK1 is roughly the same (22). Because PSC833 enters the cell as efficiently as CsA but is transported out less effectively, in the presence of P-gp, the concentration of PSC833 inside the cell will also be higher than the concentration of CsA.

The low rate of PSC833 transport is probably the main reason why other studies (20,21) reported that MDR1 cannot transport this reversal agent. Only at low concentrations of PSC833 can active transport be measured against the background of the passive influx and efflux of the drug. Most transport studies with PSC833 have used much higher drug concentrations and a less sensitive readout. Hence, it is not surprising that no active transport of PSC833 was found.

Recent experiments with mice have suggested that PSC833 is a less effective inhibitor in blood than in tissue culture

medium (18) as was also reported for several other reversal agents (28,29). We now find that the inhibitory activity of PSC833 is drastically reduced in 100% FBS relative to serum-free medium. The recent observation that 97%–99% of PSC833 in human blood plasma appears to be bound to serum lipoproteins (30) provides a plausible explanation for this decreased inhibitory activity. The high serum binding may at least partly explain the incomplete inhibition of P-gp by PSC833 in the mouse model. However, other factors (e.g., high nonspecific tissue binding) may also play a role.

*In vitro*, the influx of PSC833 into cells in monolayers may be less efficient than its influx into free-growing cells, for example, because the membrane surface area available is smaller. Permeation of drugs into solid tumors *in vivo* is often rather inefficient as well. The experiments with cells in monolayers may, therefore, mimic the *in vivo* situation better than experiments with free-growing cells. *In vitro* studies can never completely reproduce the true *in vivo* situation, however,

and this should be kept in mind in the following extrapolation of our *in vitro* results to patients.

Clinical trials with PSC833 have shown that the dose of PSC833 that can be administered to patients is limited by neurotoxicity, e.g., ataxia. The current intravenous administration regimen results in a mean blood concentration of approximately 2.2  $\mu\text{M}$  (15,16). By oral administration of PSC833, a blood concentration of 1.6  $\mu\text{M}$  is reached (31,32). Because PSC833 scarcely enters the erythrocytes, which constitute approximately half the volume of blood, the plasma concentration of PSC833 in these trials will be approximately twice as high. The PSC833 IC<sub>50</sub> values that we obtained *in vitro* for transport of digoxin, daunorubicin, and paclitaxel in serum are 3.0, 1.5, and 5.7  $\mu\text{M}$ , respectively, suggesting that PSC833 may not be able to completely block P-gp activity in patients, especially the transport of paclitaxel.

The results that were obtained in the first phase I clinical trials show an increase in the area under the curve of the administered drugs after the coadministration of PSC833 (15,16) due to the inhibition of P-gp activity in excretory organs. These results are in agreement with the results in wild-type and *mdr1a/b* (–/–) mice, obtained by Mayer et al. (18). In wild-type mice in those experiments, the P-gp in the animals' excretory organs was completely inhibited by PSC833, whereas the P-gp in the tissues of the blood-brain barrier was inhibited only partially.

Even incomplete inhibition of P-gp by PSC833 might still be useful in overcoming multidrug resistance in patients. Moreover, combination of PSC833 with other reversal agents might result in complete P-gp inhibition, since the coadministration of several reversal agents has been shown to result in additive inhibitory effects on P-gp, whereas their toxicity is rarely additive (33,34). Nevertheless, our results indicate that PSC833 may not yet be the perfect reversal agent. Because the dose-limiting toxicity of PSC833 appears to be unrelated to its inhibition of P-gp, it might be possible to find analogs that bind even tighter to P-gp without an increase in toxicity.

## References

- (1) Juliano RL, Ling V. A surface glycoprotein modulating drug permeability in Chinese hamster ovary cell mutants. *Biochim Biophys Acta* 1976;455:152–62.
- (2) Endicott JA, Ling V. The biochemistry of P-glycoprotein-mediated multidrug resistance. *Annu Rev Biochem* 1989;58:137–71.
- (3) Gottesman MM, Hrycyna CA, Schoenlein PV, Germann UA, Pastan I. Genetic analysis of the multidrug transporter. *Annu Rev Genet* 1995;29:607–49.
- (4) Germann UA. P-glycoprotein—a mediator of multidrug resistance in tumour cells. *Eur J Cancer* 1996;32A:927–44.
- (5) Ruetz S, Gros P. A mechanism for P-glycoprotein action in multidrug resistance: are we there yet? *Trends Pharmacol Sci* 1994;15:260–3.
- (6) Borst P, Schinkel AH. Genetic dissection of the function of mammalian P-glycoproteins. *Trends Genet* 1997;13:217–22.
- (7) Tsuruo T, Iida H, Naganuma K, Tsukagoshi S, Sakurai Y. Promotion by verapamil of vincristine responsiveness in tumor cell lines inherently resistant to the drug. *Cancer Res* 1983;43:808–13.
- (8) Tsuruo T, Iida H, Tsukagoshi S, Sakurai Y. Overcoming of vincristine resistance in P388 leukemia *in vivo* and *in vitro* through enhanced cytotoxicity of vincristine and vinblastine by verapamil. *Cancer Res* 1981;41:1967–72.
- (9) Ford JM, Hait WN. Pharmacology of drugs that alter multidrug resistance in cancer. *Pharmacol Rev* 1990;42:155–99.
- (10) Dalton WS, Crowley JJ, Salmon SS, Grogan TM, Laufman LR, Weiss GR, et al. A phase III randomized study of oral verapamil as a chemosensitizer to reverse drug resistance in patients with refractory myeloma. A Southwest Oncology Group study. *Cancer* 1995;75:815–20.
- (11) Wishart GC, Bissett D, Paul J, Jodrell D, Harnett A, Habeshaw T, et al. Quinidine as a resistance modulator of epirubicin in advanced breast cancer: mature results of a placebo-controlled randomized trial. *J Clin Oncol* 1994;12:1771–7.
- (12) Wilson WH, Bates SE, Fojo A, Bryant G, Zhan Z, Regis J, et al. Controlled trial of dexverapamil, a modulator of multidrug resistance, in lymphomas refractory to EPOCH chemotherapy. *J Clin Oncol* 1995;13:1995–2004.
- (13) Boesch D, Gaveriaux C, Jachez B, Pourtier-Manzanedo A, Bollinger P, Loor F. *In vivo* circumvention of P-glycoprotein-mediated multidrug resistance of tumor cells with SDZ PSC 833. *Cancer Res* 1991;51:4226–33.
- (14) Twentyman PR, Bleehen NM. Resistance modification by PSC-833, a novel non-immunosuppressive cyclosporin [published erratum appears in *Eur J Cancer* 1992;28:6160]. *Eur J Cancer* 1991;27:1639–42.
- (15) Boote DJ, Dennis IF, Twentyman PR, Osborne RJ, Laburte C, Hensel S, et al. Phase I study of etoposide with SDZ PSC 833 as a modulator of multidrug resistance in patients with cancer. *J Clin Oncol* 1996;14:610–8.
- (16) Sonneveld P, Marie JP, Huisman C, Vekhoff A, Schoester M, Faussat AM, et al. Reversal of multidrug resistance by SDZ PSC 833, combined with VAD (vincristine, doxorubicin, dexamethasone) in refractory multiple myeloma. A phase I study. *Leukemia* 1996;10:1741–50.
- (17) Schinkel AH, Mayer U, Wagenaar E, Mol CA, van Deemter L, Smit JJ, et al. Normal viability and altered pharmacokinetics in mice lacking *mdr1*-type (drug-transporting) P-glycoproteins. *Proc Natl Acad Sci U S A* 1997;94:4028–33.
- (18) Mayer U, Wagenaar E, Dorobek B, Beijnen JH, Borst P, Schinkel AH. *In vivo* inhibitory activity and selectivity of SDZ PSC833 on mouse *mdr1*-type P-glycoproteins. *J Clin Invest* 1997;100:2430–36.
- (19) Lemaire M, Bruelisauer A, Guntz P, Sato H. Dose-dependent brain penetration of SDZ PSC 833, a novel multidrug resistance-reversing cyclosporin, in rats. *Cancer Chemother Pharmacol* 1996;38:481–6.
- (20) Naito M, Watanabe T, Tsuge H, Koyama T, Oh-hara T, Tsuruo T. Potentiation of the reversal activity of SDZ PSC833 on multi-drug resistance by an anti-P-glycoprotein monoclonal antibody MRK-16. *Int J Cancer* 1996;67:435–40.
- (21) Archinal-Mattheis A, Rzepka RW, Watanabe T, Kokubu N, Itoh Y, Combates NJ, et al. Analysis of the interactions of SDZ PSC 833 ([3'-keto-Bmt1]-Val2]-Cyclosporine), a multidrug resistance modulator, with P-glycoprotein. *Oncol Res* 1995;7:603–10.
- (22) Schinkel AH, Wagenaar E, van Deemter L, Mol CA, Borst P. Absence of the *mdr1a* P-glycoprotein in mice affects tissue distribution and pharmacokinetics of dexamethasone, digoxin, and cyclosporin A. *J Clin Invest* 1995;96:1698–705.
- (23) Schinkel AH, Kemp S, Dolle M, Rudenko G, Wagenaar E. N-glycosylation and deletion mutants of the human MDR1 P-glycoprotein. *J Biol Chem* 1993;268:7474–81.
- (24) Ueda K, Okamura N, Hirai M, Tanigawara Y, Saeki T, Kioka N, et al. Human P-glycoprotein transports cortisol, aldosterone, and dexamethasone, but not progesterone. *J Biol Chem* 1992;267:24248–52.
- (25) Spoelstra EC, Westerhoff HV, Dekker H, Lankelma J. Kinetics of daunorubicin transport by P-glycoprotein of intact cancer cells. *Eur J Cancer* 1992;207:567–79.
- (26) Tiberghien F, Loor F. Ranking of P-glycoprotein substrates and inhibitors by a calcein-AM fluorimetry screening assay. *Anticancer Drugs* 1997;7:568–78.
- (27) Tanigawara Y, Okamura N, Hirai M, Yasuhara M, Ueda K, Kioka N, et al. Transport of digoxin by human P-glycoprotein expressed in a porcine kidney epithelial cell line (LLC-PK1). *J Pharmacol Exp Ther* 1992;263:840–5.
- (28) Lehnert M, de Giuli R, Kunke K, Emerson S, Dalton WS, Salmon SE. Serum can inhibit reversal of multidrug resistance by chemosensitisers. *Eur J Cancer* 1996;32A:862–7.
- (29) Ludescher C, Eisterer W, Hilbe W, Hofmann J, Thaler J. Decreased potency of MDR-modulators under serum conditions determined by a functional assay. *Br J Haematol* 1995;91:652–7.
- (30) Simon N, Dailly E, Combes O, Melaurie E, Lemaire M, Tillement JP, et al. Role of lipo-

proteins in the plasma binding of SDZ PSC 833, a novel multidrug-resistance reversing cyclosporine. *Br J Clin Pharmacol* 1998;45: 173-5.

- (31) Figg WD, Meadows B, Regis J, Tawfik E, Piscitelli S, Waldrop BA, et al. Oral bioavailability of PSC833, a P-glycoprotein antagonist. *Pharmacotherapy* 1994;14:362.
- (32) Giaccone G, Linn SC, Catimel G, Dumortier A, Foy M, Vermorken JB, et al. SDZ PSC833 in combination with doxorubicin: a phase I and pharmacologic study in solid tumors. *Anticancer Drugs* 1994;5:42-3.
- (33) Ayesh S, Shao YM, Stein WD. Co-operative,

competitive and non-competitive interactions between modulators of P-glycoprotein. *Biochim Biophys Acta* 1996;1316:8-18.

- (34) Lyubimov E, Lan LB, Pashinsky I, Ayesh S, Stein WD. Saturation reversal of the multidrug pump using many reversers in low-dose combinations. *Anticancer Drugs* 1995;6:727-35.

## Notes

*Present address:* U. Mayer, Universitäts Klinik Eppendorf, Department of Internal Medicine, Division of Oncology/Hematology, Hamburg, Germany.

*Present address:* A. H. Schinkel, Division of Ex-

perimental Therapy, The Netherlands Cancer Institute, Amsterdam.

Supported by grant NKI 92-41 from the Dutch Cancer Society (P. Borst).

We thank Drs. R. Evers and J. Schellens (The Netherlands Cancer Institute) and W. Niederberger and L. Kawai (Novartis Pharma Inc., Basel, Switzerland) for their critical comments on the manuscript, Dr. J. Beijnen and Mr. A. Hart for their useful advice, and Dr. M. Lemaire (Novartis Pharma Inc.) for providing [<sup>14</sup>C]PSC833 and for communicating his unpublished results.

Manuscript received October 21, 1997; revised May 29, 1998; accepted June 5, 1998.
